# Supplementary material
Source: PubMed Central journal article supplement (PMC7403347)
Supplement: mmc1.pdf [file mmc1.pdf]

YMTHE, Volume 28

## **Supplemental Information**

### **Perivascular Stem Cell-Derived Cyclophilin A Improves Uterine Environment with Asherman's Syndrome via HIF1 $\alpha$ -Dependent Angiogenesis**

**Mira Park, Seok-Ho Hong, So Hee Park, Yeon Sun Kim, Seung Chel Yang, Hye-Ryun Kim, Songmi Noh, Sunghun Na, Hyung Keun Lee, Hyunjung J. Lim, Sang Woo Lyu, and Haengseok Song**

Figure S1

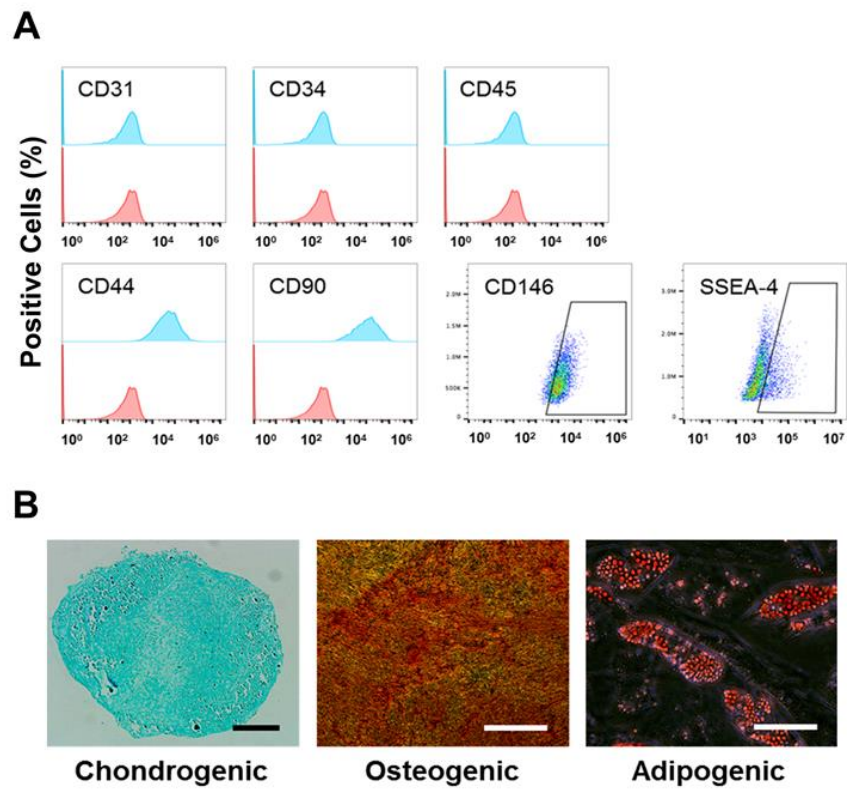

**Figure S1. Molecular and cellular characterization of hPVSCs as MSCs.** (A) Representative flow cytometry histograms and dot plots for phenotypic analyses of hPVSCs (passage 2). The pink histograms show the isotype control. (B) Multilineage differentiation of hPVSCs. Representative images of Alcian blue staining of chondrocytes, Alizarin Red S staining of osteocytes, and Oil Red O staining of adipocytes. Scale bar: 100  $\mu$ m.

Figure S2

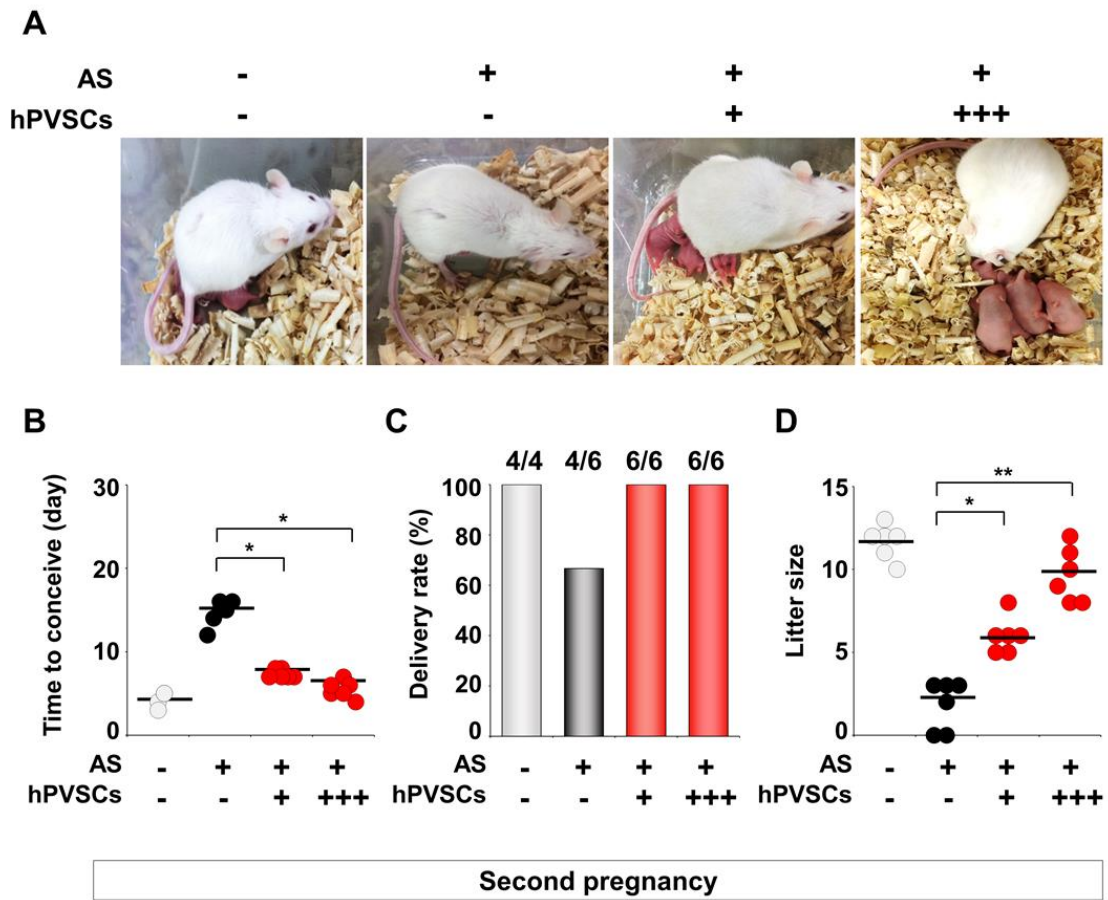

**Figure S2. Therapeutic actions of hPVSCs on chronic reproductive impairments in mice with AS.** (A) Representative photographs of mice with AS after the second delivery. +; IU delivery of hPVSCs ( $1 \times 10^6$ ), +++; a single IU followed by 3 IP delivery of hPVSCs ( $1 \times 10^6$ ). Therapeutic effects of hPVSCs on time to conceive (B), delivery rate (C), and litter size (D) in the second pregnancies of mice with AS. The horizontal black lines represent median values. Numbers above the bars indicate the number of mice that delivered live pup(s)/total mice examined. \*,  $P < 0.05$ , \*\*,  $P < 0.01$ .

Figure S3

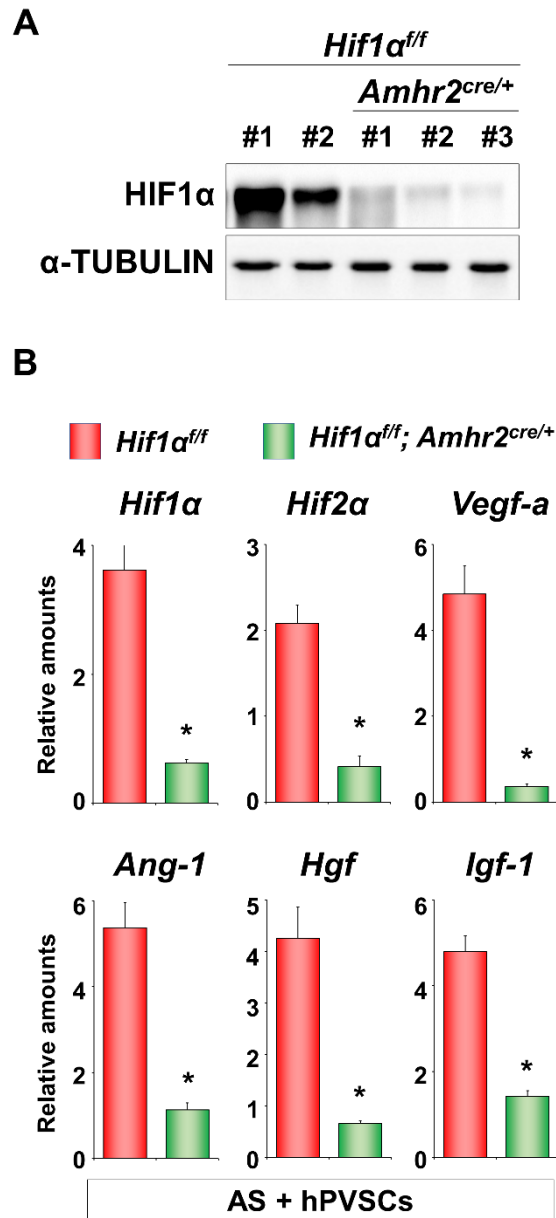

**Figure S3. Conditional deletion of uterine Hif1α using Amhr2-Cre and expression of angiogenic factors in *Hif1α<sup>ff</sup>;Amhr2<sup>cre/+</sup>* mice with AS after hPVSCs therapy.** (A) Western blotting for the HIF1α deletion in the uteri of *Hif1α<sup>ff</sup>; Amhr2<sup>cre/+</sup>* mice. α-TUBULIN was used as the loading control. (B) Real-time RT-PCR analyses of expression of angiogenesis-related factors in *Hif1α<sup>ff</sup>;Amhr2<sup>cre/+</sup>* mice with AS after hPVSCs transplantation.

Figure S4

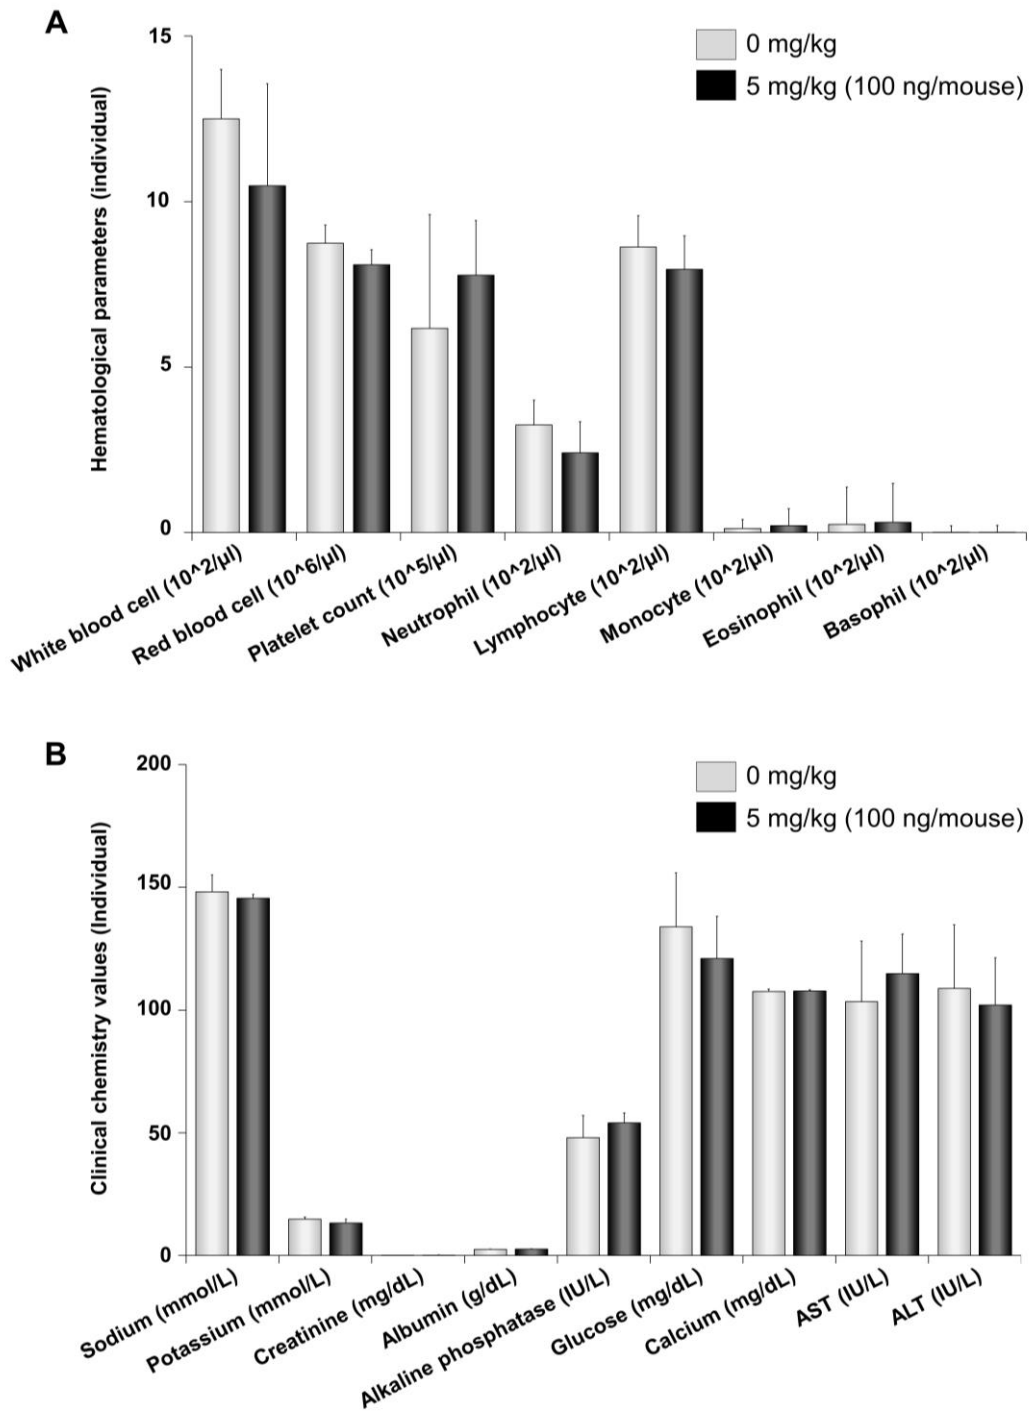

**Figure S4. Immune cell profiles and general toxicity in mice after intrauterine administration of CYP-A at 100 ng/mouse.** Cell count analyses of various immune cells of whole blood (A) and biochemical assays of serum (B) 24 h after CYP-A treatment. AST; aspartate transaminase, ALT; alanine transaminase.

**Table S1. List of secreted proteins from human perivascular stem cells**

| <b>No.</b> | <b>Protein name</b>                        | <b>NCBI BLAST</b> | <b>Score</b> | <b>Mass</b> |
|------------|--------------------------------------------|-------------------|--------------|-------------|
| 1          | Profilin-1                                 | NP_005013.1       | 1071         | 15225       |
|            | Cystatin-C precursor                       | NP_000090.1       | 70           | 16029       |
| 2          | Peptidylprolyl isomerase A (Cyclophilin A) | AAH07104.1        | 1025         | 18239       |
|            | hCG2016877, isoform CRA_c                  | EAW74247.1        | 81           | 44298       |
|            | Transgelin                                 | NP_003177.2       | 73           | 22674       |
|            | Hypothetical protein, partial              | CAH18175.1        | 46           | 199821      |
|            | Collagen, type V, alpha 2, isoform CRA_b   | EAX10907.1        | 41           | 86488       |
| 3          | Collagen alpha-2(V) chain                  | CAA28454.1        | 41           | 106111      |
|            | Mucin short variant                        | AAK30142.1        | 40           | 18378       |
|            | Tropomyosin beta chain isoform Tpm2.1sm/cy | NP_998839.1       | 389          | 33050       |
|            | Cofilin-1                                  | NP_005498.1       | 182          | 18724       |
| 4          | Cofilin-2 isoform 1                        | NP_068733.1       | 60           | 18848       |
|            | PEX5-related protein isoform X8            | XP_011511190.1    | 41           | 66711       |
| 5          | Crystal Structure of Anthrax Edema Factor  | 1XFU_O            | 126          | 16839       |
|            | Macrophage expressed 1                     | AAI12231.1        | 42           | 79660       |
| 6          | Cadherin 2, type 1, N-cadherin (neuronal)  | EAX01239.1        | 113          | 94379       |
|            | Keratin 13 (KRT13), transcript variant 1   | BAF82933.1        | 67           | 49869       |
|            | Transgelin variant, partial                | BAD92792.1        | 68           | 12321       |
| 7          | UTP15 protein                              | AAH13064.1        | 47           | 32546       |
|            | Apolipoprotein B mRNA editing enzyme       | BAD92216.1        | 46           | 25657       |
|            | cDNA FLJ13705 fis, clone PLACE2000302      | BAB14672.1        | 40           | 23050       |
| 8          | Plasminogen                                | AAH60513.1        | 47           | 93333       |
| 9          | Coiled-coil domain-containing protein 180  | Q9P1Z9.2          | 43           | 192570      |
|            | Actin-related protein 2/3 complex          | NP_005708.1       | 41           | 16381       |

**Table S2. Primer sequences for genotyping**

| <b>Genotype</b>                             |         | <b>Sequence (5'-3')</b>   | <b>Size (bp)</b> |
|---------------------------------------------|---------|---------------------------|------------------|
| <i>Hif1<math>\alpha</math><sup>ff</sup></i> | Forward | TGCATGTGTATGGGTGTTTTG     | WT: 99           |
|                                             | Reverse | GAAAACTGTCTGTAACTTCATTTCC | f/f: 120         |
| <i>Amhr2<sup>cre/+</sup></i>                | Forward | GGACATG TTCAGGGATCGCCAGGC | Cre: 219         |
|                                             | Reverse | CGACGATGAAGCATGTTTAGCTG   |                  |

**Table S3. Primer sequences for RT-PCR and real-time RT-PCR**

| <b>Gene</b>   |         | <b>Sequence (5'-3')</b>   | <b>Size (bp)</b> |
|---------------|---------|---------------------------|------------------|
| <i>Col1a1</i> | Forward | CTGGCGGTTTCAGGTCCAAT      | 141              |
|               | Reverse | TTCCAGGCAATCCACGAGC       |                  |
| <i>Timp1</i>  | Forward | GGGTTCCCCAGAAATCAACGAG    | 139              |
|               | Reverse | ACAGAGGCTTTCCATGACTGGGGTG |                  |
| <i>Tgfβ1</i>  | Forward | GTGAAACGGAAGCGCATCGAAG    | 193              |
|               | Reverse | CATAGTAGTCCGCTTCGGGCTCC   |                  |
| <i>Tnfa</i>   | Forward | CTGAACTTCGGGGTGATCGG      | 122              |
|               | Reverse | GGCTTGTCACTCGAATTTTGAGA   |                  |
| <i>Hif1α</i>  | Forward | ACAAGTCACCACAGGACAG       | 168              |
|               | Reverse | AGGGAGAAAATCAAGTCG        |                  |
| <i>Hif2α</i>  | Forward | AATGACAGCTGACAAGGAGAAAAA  | 257              |
|               | Reverse | GAGTGAAGTCAAAGATGCTGTGTC  |                  |
| <i>Vegf-a</i> | Forward | GCAGGCTGCTGTAACGATGA      | 105              |
|               | Reverse | GCATGATCTGCATGGTGATGTT    |                  |
| <i>Ang-1</i>  | Forward | GGGACAGCAGGCAAACAGA       | 110              |
|               | Reverse | TGTCGTTATCAGCATCCTTCGT    |                  |
| <i>Hgf</i>    | Forward | CTGACCCAAACATCCGAGTTG     | 125              |
|               | Reverse | TTCCCATTGCCACGATAACAA     |                  |
| <i>Igf-1</i>  | Forward | TGCTTCCGGAGCTGTGATCT      | 125              |
|               | Reverse | CGGGCTGCTTTTGTAGGCT       |                  |
